# Supplementary material
Source: Atypon-hosted journal article supplement (https://mail.jpma.org.pk/PdfDownloadsupplements/392)
Supplement: 392 [file 392]

One moment, please...


# Please wait while your request is being verified...
